# Supplementary material
Source: publisher figshare collection journal article supplement (https://acs.figshare.com/ndownloader/files/13631318)
Supplement: Supplementary file 1 [file 13631318]

## Supporting Information

### **Boron-Doped TiO<sub>2</sub> for Efficient Electrocatalytic N<sub>2</sub> Fixation to NH<sub>3</sub> at Ambient Conditions**

Yuan Wang,<sup>†,‡</sup> Kun Jia,<sup>†,‡</sup> Qi Pan,<sup>†,‡</sup> Yadi Xu,<sup>†</sup> Qian Liu,<sup>§</sup> Guanwei Cui,<sup>||</sup> Xiaodong Guo,<sup>\*,†</sup> Xuping Sun<sup>\*,‡</sup>

<sup>†</sup>Chemical Engineering Institute, Sichuan University, Chengdu 610065, Sichuan, China, <sup>‡</sup>Institute of Fundamental and Frontier Sciences, University of Electronic Science and Technology of China, Chengdu 610054, Sichuan, China, <sup>§</sup>School of Materials and Energy, University of Electronic Science and Technology of China, Chengdu 611731, Sichuan, China, <sup>||</sup>College of Chemistry, Chemical Engineering and Materials Science, Shandong Normal University, Jinan 250014, Shandong, China

\*E-mail: xiaodong2009@163.com (X.G.); xpsun@uestc.edu.cn (X.S.)

## Content

### Experimental Section

|                                                      |                   |
|------------------------------------------------------|-------------------|
| Rietveld refinement of XRD pattern.....              | <b>Figure S1</b>  |
| SEM images.....                                      | <b>Figure S2</b>  |
| UV-Vis absorption spectra and Calibration curve..... | <b>Figure S3</b>  |
| UV-Vis absorption spectra and Calibration curve..... | <b>Figure S4</b>  |
| LSV curves.....                                      | <b>Figure S5</b>  |
| Recycling tests.....                                 | <b>Figure S6</b>  |
| NH <sub>3</sub> yields.....                          | <b>Figure S7</b>  |
| NH <sub>3</sub> production rates and FEs.....        | <b>Figure S8</b>  |
| <sup>15</sup> N isotope labeling experiment.....     | <b>Figure S9</b>  |
| UV-Vis absorption spectra.....                       | <b>Figure S10</b> |
| Characterization after prolonged testing.....        | <b>Figure S11</b> |
| Nyquist plots.....                                   | <b>Figure S12</b> |
| CV curves.....                                       | <b>Figure S13</b> |
| Rietveld refinement.....                             | <b>Table S1</b>   |
| Comparison of NRR performance.....                   | <b>Table S2</b>   |

## Experimental section

**Materials:** Tetrabutyl titanate was purchased from Aladdin Ltd. (Shanghai, China).  $\text{H}_3\text{BO}_4$  was purchased from Chendu Chemical Corporation. Sodium salicylate ( $\text{C}_7\text{H}_5\text{O}_3\text{Na}$ ), p-dimethylaminobenzaldehyde ( $\text{C}_9\text{H}_{11}\text{NO}$ ), sodium citrate dehydrate ( $\text{C}_6\text{H}_5\text{Na}_3\text{O}_7 \cdot 2\text{H}_2\text{O}$ ), sodium hypochlorite solution ( $\text{NaClO}$ ) were purchased from Beijing Chemical Corp. (China). Nafion (5 wt%) were purchased from Sigma-Aldrich Chemical Reagent Co., Ltd. All chemicals were used as received without further purification.

**Synthesis of  $\text{TiO}_2$ :** a mixture solution with 10 mL Tetrabutyl titanate and 60 mL alcohol was added drop-wise into 100 mL alcohol with 10 mL distilled water. The resultant mixture was stirred at room temperature for 1 h and then age 4 h to obtain the ivory sol. The sol was heated at 60 °C for 18 h to get the dry bulk which was ground to the powder. Finally, the powder was calcined at 400 °C for 3h to obtain pure  $\text{TiO}_2$ .

**Synthesis of B- $\text{TiO}_2$ :** In a typical procedure, 1 g  $\text{H}_3\text{BO}_4$  and 10 mL distilled water was firstly dissolved into 100 mL alcohol under continuous stirring. Then, a mixture solution with 10 mL Tetrabutyl titanate and 60 mL alcohol was added drop-wise into above solution under mechanical stirring. The resultant mixture was stirred at room temperature for 1 h and then age 4 h to obtain the ivory sol. The sol was heated at 60 °C for 18 h to get the dry bulk which was ground to the powder. Finally, the powder was calcined at 400 °C for 3h to obtain the boron-doped  $\text{TiO}_2$ .

**Characterization:** XRD data were collected on X-ray diffractometer (Philip Company, Pw1730) equipped with a Cu  $\text{K}\alpha$  radiation ( $\lambda=1.5418 \text{ \AA}$ ). XPS data were collected on an ESCALABMK II X-ray photoelectron spectrometer using Mg as the exciting source. SEM measurements were performed on a Hitachi S-4800 filed emission scanning electron microscope at an accelerating voltage of 20kV. TEM measurements were carried out on a Zeiss Libra 200FE transmission electron microscope operated at 200 kV.

**Electrochemical measurement:** N<sub>2</sub> reduction reaction tests were carried out in a two-compartment electrocatalytic cell separated by Nafion 211 membrane under ambient condition. The membrane was protonated by first boiling in ultrapure water for 1 h and treating in H<sub>2</sub>O<sub>2</sub> (5%) aqueous solution at 80°C for 1 h. Then, the membrane was treaded in 0.1 M H<sub>2</sub>SO<sub>4</sub> for 3 h at 80 °C and finally in water for 6 h. All the electrochemical measurements were tested using a CHI660E workstation (CH Instruments, China) in a typical three-electrode setup with an electrolyte solution of 0.1 M Na<sub>2</sub>SO<sub>4</sub> (33 mL), a graphite rod as the counter electrode and Ag/AgCl as the reference electrode. The potentials reported in this work were converted to RHE scale via calibration with the following equation:  $E \text{ (vs RHE)} = E \text{ (vs Ag/AgCl)} + 0.197 + 0.059 \times \text{pH}$ . Before the measurement, the Na<sub>2</sub>SO<sub>4</sub> electrolyte was bubbled with N<sub>2</sub> for 30 min.

**Determination of NH<sub>3</sub>:** The produced NH<sub>3</sub> was spectrophotometrically determined by indophenol blue method. In detail, 4 mL of post-tested solution was got from the electrochemical reaction vessel. Then, 50 uL of oxidation (contains 0.4 M sodium salicylate and 0.32 M sodium hydroxide), 500 uL of the colouring solution (sodium hypochlorite and 0.75 M sodium hydroxide) and 50 uL pf catalyst solution (0.1g sodium nitroferricyanide(III) dehydrate diluted to 10ml with deionized water) were added respectively to the sample solution. Absorbance measurments were performed after 2 h. The concentration of indophenol blue was determined using the absorbance at awavelength of 660 nm. The concentration-absorbance curve was calibrated using standard ammonia chloride solution with a serious of concentrations. The fitting curve ( $y = 0.709x + 0.017$ ,  $R^2 = 0.999$ ) shows good linear relation of absorbance value with NH<sub>3</sub> concentration by three times independent calibrations. The NH<sub>3</sub> concentration was calculated form the calibration curve, and the rate of NH<sub>3</sub> yield was calculated using the following equation:

$$R_{NH3} = (c_{NH3} \times V) / (t \times m_{cat.})$$

where  $c_{NH3}$  is the measured NH<sub>3</sub> concentration,  $V$  is the volume of electrolyte,  $t$  is the reduction reaction time and  $m_{cat.}$  is the loaded mass of catalyst.

**Calculation of Faradic efficiency (FE):** Assuming three electrons were needed to produce one  $\text{NH}_3$  molecule, the FE in 0.1 M  $\text{Na}_2\text{SO}_4$  could be calculated as follows:

$$\text{FE} = 3F \times c_{\text{NH}_3} \times V / 17 \times Q$$

Where  $F$  is the Faraday constant,  $Q$  is the quantity of applied electricity.

**Determination of  $\text{N}_2\text{H}_4$ :** The  $\text{N}_2\text{H}_4$  presented in the electrolyte was estimated. A mixed solution of 5.99 g  $\text{C}_9\text{H}_{11}\text{NO}$ , 0.1 M  $\text{Na}_2\text{SO}_4$  (30 mL) and 300 mL ethanol was used as a color reagent. Calibration curve was plotted as follow: First, preparing a series of reference solutions; second, adding 5 mL above prepared color reagent and stirring 20 min at room temperature; finally, the absorbance of the resulting solution was measured at 455 nm, and the yields of  $\text{N}_2\text{H}_4$  were estimated from a standard curve using 5 mL residual electrolyte and 5 mL color reagent. Absolute calibration of this method was achieved using  $\text{N}_2\text{H}_4 \cdot \text{H}_2\text{O}$  solutions of known concentration as standards, and the fitting curve shows good linear relation of absorbance with  $\text{N}_2\text{H}_4 \cdot \text{H}_2\text{O}$  concentration ( $y = 1.149x + 0.035$ ,  $R^2 = 0.999$ ) by three times independent calibrations.

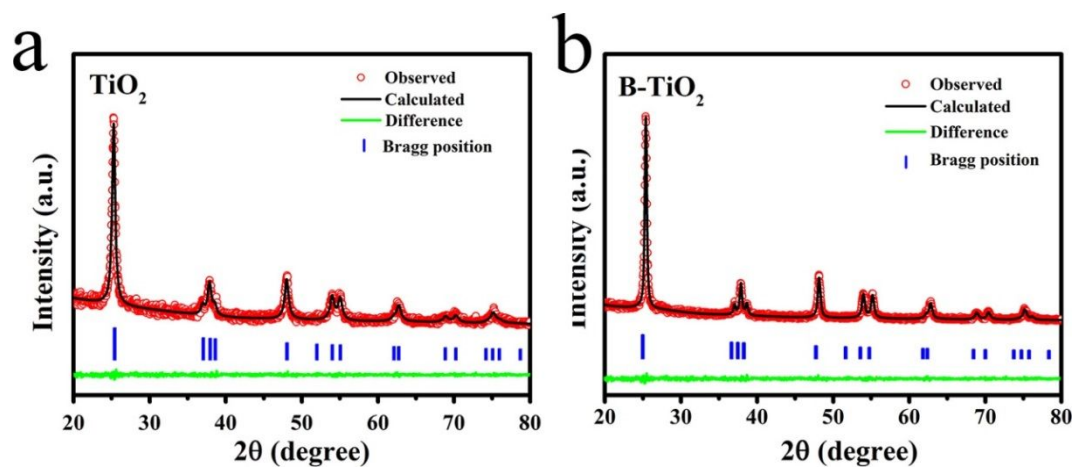

**Figure S1.** Powder XRD patterns as well as Rietveld refinements for (a)  $\text{TiO}_2$  and (b)  $\text{B-TiO}_2$ .

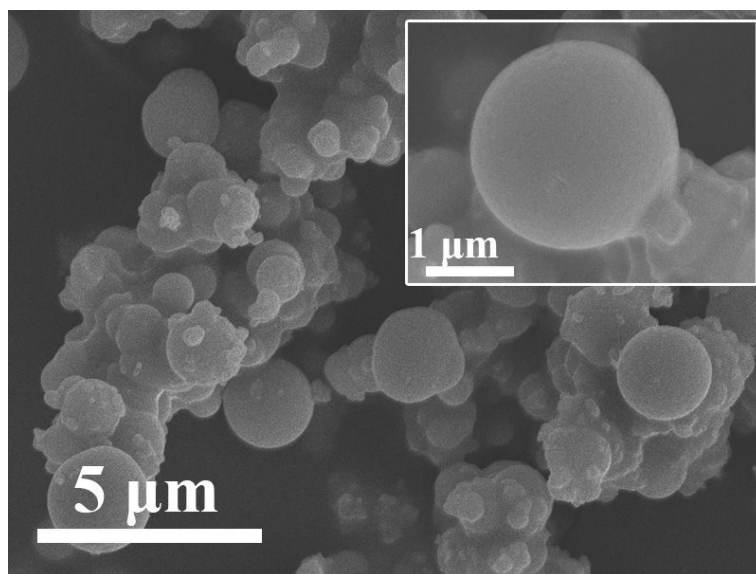

**Figure S2.** SEM images of pristine TiO<sub>2</sub> particles.

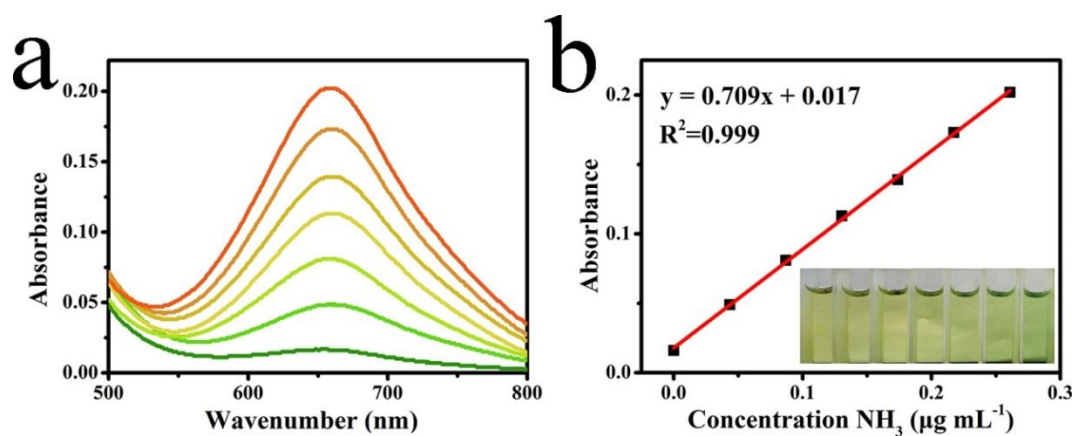

**Figure S3.** (a) UV-Vis absorption spectra of indophenol assays with  $\text{NH}_4^+$  in 0.1 M  $\text{Na}_2\text{SO}_4$  after incubated for 60 min at room temperature. (b) Calibration curve used for calculation of  $\text{NH}_3$  concentration.



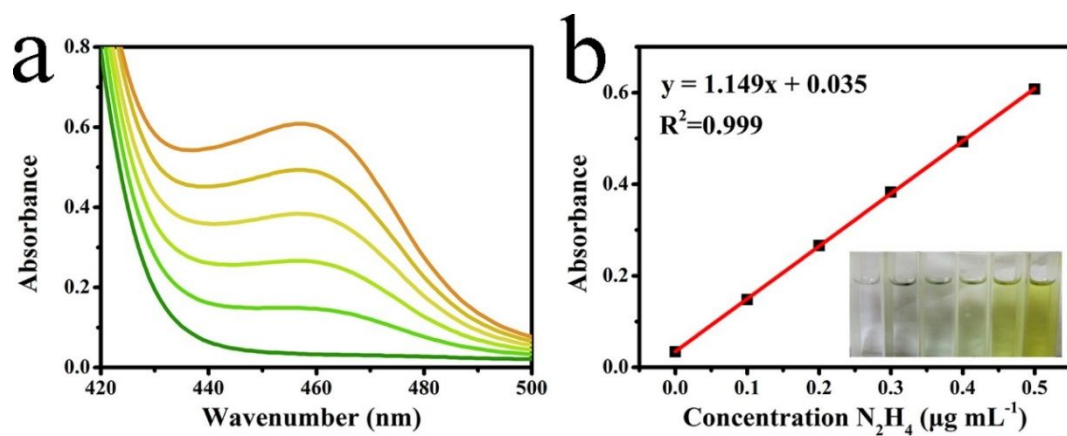

**Figure S4.** (a) UV-Vis absorption spectra of various  $\text{N}_2\text{H}_4$  concentrations stained with  $p\text{-C}_9\text{H}_{11}\text{NO}$  indicator after incubated for 20 min at room temperature. (b) Calibration curve used for calculation of  $\text{N}_2\text{H}_4$  concentration.

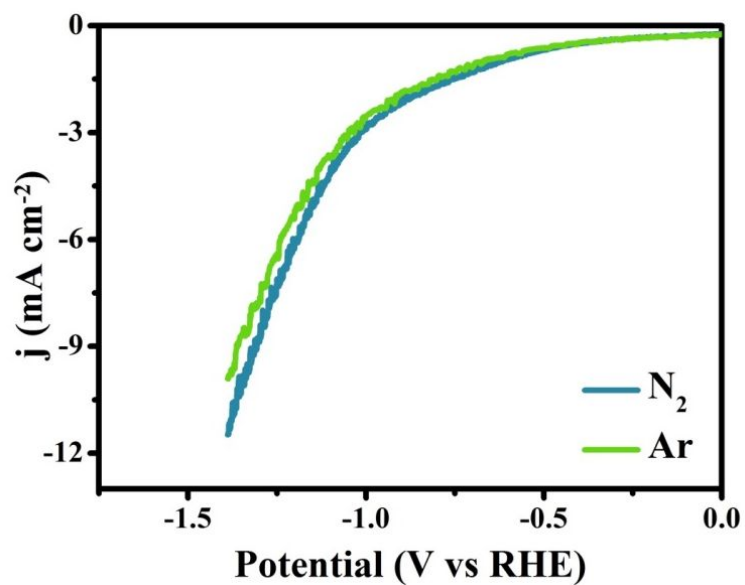

**Figure S5.** LSV curves of B-TiO<sub>2</sub>/CPE in N<sub>2</sub> and Ar saturated 0.1 M Na<sub>2</sub>SO<sub>4</sub> with a scan rate of 20 mV s<sup>-1</sup>.

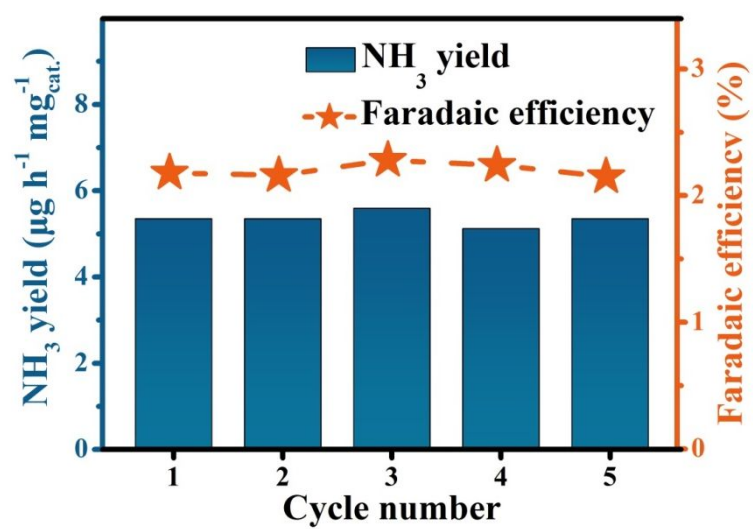

**Figure S6.** Recycling tests at potential of -0.80 V for  $\text{TiO}_2$ .

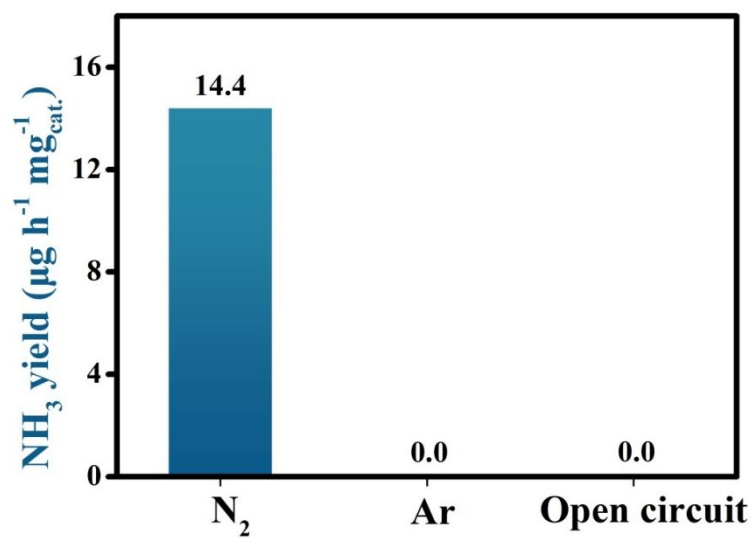

**Figure S7.**  $\text{NH}_3$  yields at -0.80 V in  $\text{N}_2$ -saturated solution, and -0.80 V in Ar-saturated solution, and open circuit potential in  $\text{N}_2$ -saturated solution.

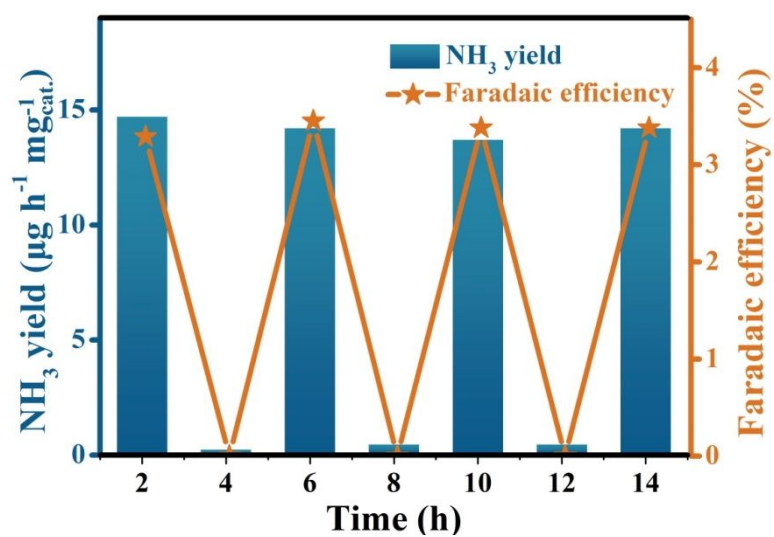

**Figure S8.** NH<sub>3</sub> production rates and FEs of B-TiO<sub>2</sub>/CPE.

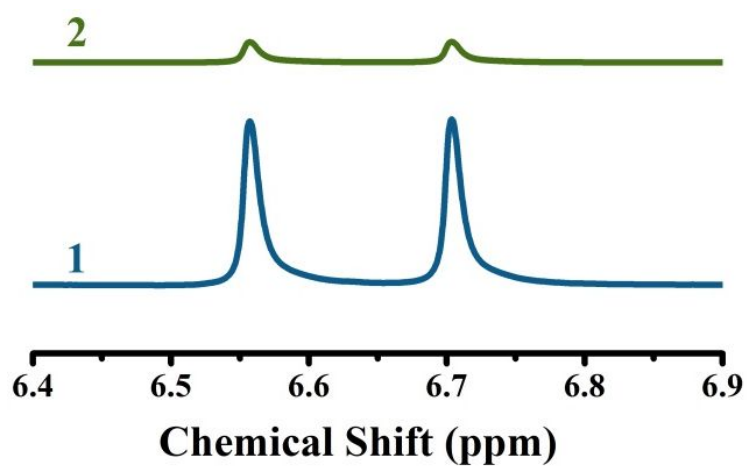

**Figure S9.**  $^1\text{H}$  NMR spectra for  $^{15}\text{NH}_4^+$  standard sample (curve 1) and the electrolysis product using  $^{15}\text{N}_2$  as the feeding gas (curve 2).

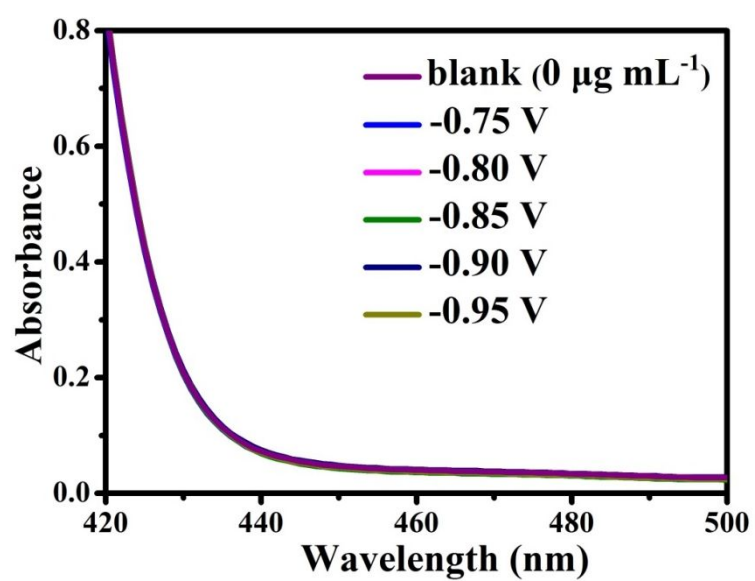

**Figure S10.** UV-Vis absorption spectra of the electrolytes stained with p-C<sub>9</sub>H<sub>11</sub>NO indicator after NRR electrolysis at a series of potentials.

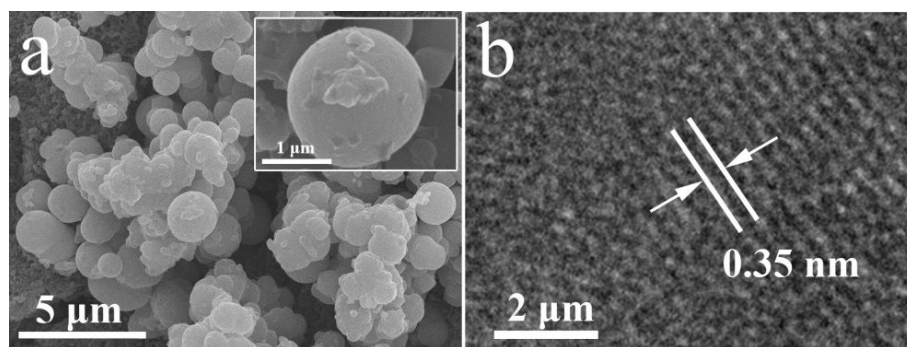

**Figure S11.** (a) SEM and (b) HRTEM images for B-TiO<sub>2</sub> after long-term NRR test.



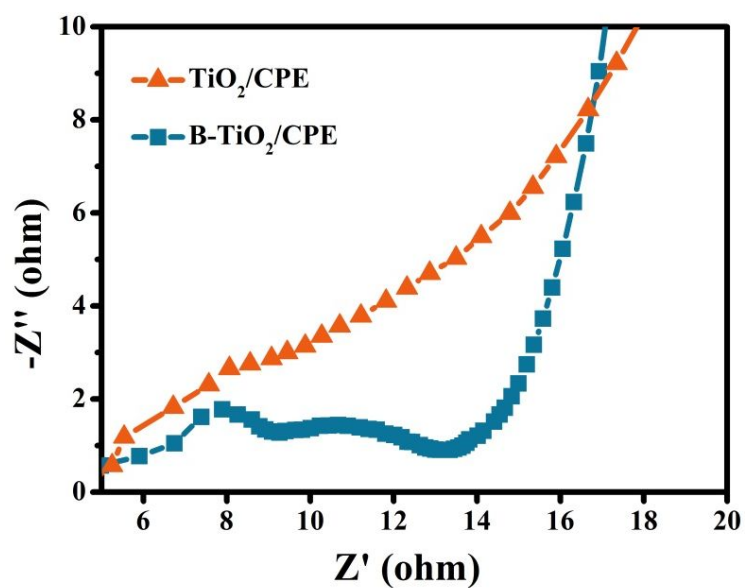

**Figure S12.** Nyquist plots of B-TiO<sub>2</sub>/CPE and TiO<sub>2</sub>/CPE in the frequency range from 1000 kHz to 1Hz with a voltage amplitude of 5 mV, and all the three electrodes are in one compartment cell being full of 0.1 M Na<sub>2</sub>SO<sub>4</sub> solution at room temperature (25 °C).

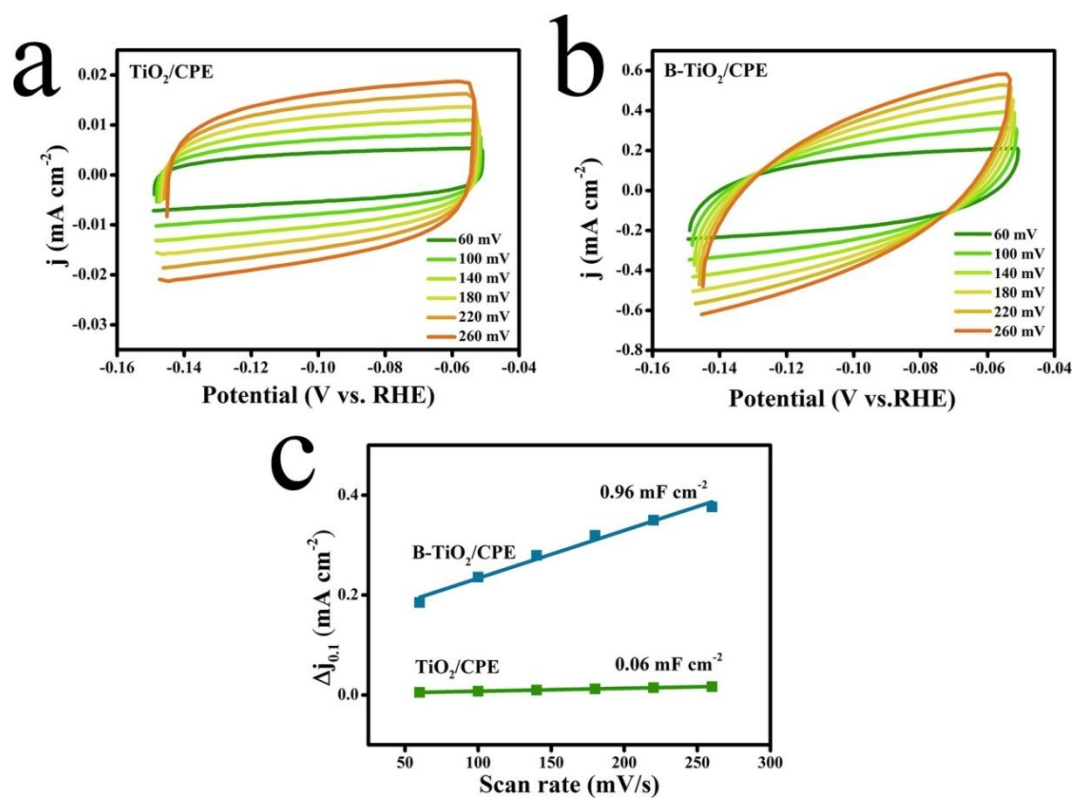

**Figure S13.** CV curves (a)  $\text{TiO}_2/\text{CPE}$  and (b)  $\text{B-TiO}_2/\text{CPE}$ . (c) The capacitive currents at -0.10 V as a function of scan rates for  $\text{B-TiO}_2/\text{CPE}$  and  $\text{TiO}_2/\text{CPE}$ .

**Table S1.** Rietveld refinement of XRD data for TiO<sub>2</sub> and B-TiO<sub>2</sub>.

| Sample             | Lattice parameter |        |        | Unit cell volume (Å <sup>3</sup> ) | R <sub>wp</sub> | R <sub>p</sub> | X <sup>2</sup> |
|--------------------|-------------------|--------|--------|------------------------------------|-----------------|----------------|----------------|
|                    | a-Axis            | b-Axis | c-Axis |                                    |                 |                |                |
| TiO <sub>2</sub>   | 3.7870            | 3.7870 | 9.492  | 136.14                             | 12.74           | 9.11           | 0.9337         |
| B-TiO <sub>2</sub> | 3.7844            | 3.7844 | 9.516  | 136.29                             | 10.92           | 7.91           | 1.4314         |

**Table S2.** Comparison of the NRR performances for B-TiO<sub>2</sub> with other

| Catalyst                                           | Electrolyte                           | NH <sub>3</sub> yield                                         | FE(%) | Ref.      |
|----------------------------------------------------|---------------------------------------|---------------------------------------------------------------|-------|-----------|
| B-TiO <sub>2</sub>                                 | 0.1 M Na <sub>2</sub> SO <sub>4</sub> | 14.4 μg h <sup>-1</sup> mg <sup>-1</sup> <sub>cat.</sub>      | 3.4   | This work |
| TiO <sub>2</sub> nanosheets array                  | 0.1 M Na <sub>2</sub> SO <sub>4</sub> | 5.6 μg h <sup>-1</sup> cm <sup>-2</sup>                       | 2.5   | (1)       |
| TiO <sub>2</sub> -rGO                              | 0.1 M Na <sub>2</sub> SO <sub>4</sub> | 15.13 μg h <sup>-1</sup> mg <sup>-1</sup> <sub>cat.</sub>     | 3.3   | (2)       |
| γ-Fe <sub>2</sub> O <sub>3</sub>                   | 0.1 M KOH                             | 0.212 μg h <sup>-1</sup> mg <sup>-1</sup> <sub>cat.</sub>     | 1.9   | (3)       |
| Fe <sub>3</sub> O <sub>4</sub> /Ti                 | 0.1 M Na <sub>2</sub> SO <sub>4</sub> | 3.42 μg h <sup>-1</sup> cm <sup>-2</sup>                      | 2.6   | (4)       |
| Fe <sub>2</sub> O <sub>3</sub> nanorods            | 0.1 M Na <sub>2</sub> SO <sub>4</sub> | 15.9 μg h <sup>-1</sup> mg <sup>-1</sup> <sub>cat.</sub>      | 0.94  | (5)       |
| MoS <sub>2</sub> /CC                               | 0.1 M Na <sub>2</sub> SO <sub>4</sub> | 4.94 μg h <sup>-1</sup> cm <sup>-2</sup>                      | 1.17  | (6)       |
| Pd <sub>0.2</sub> Cu <sub>0.8</sub> /rGO           | 0.1 M KOH                             | 2.8 μg h <sup>-1</sup> mg <sup>-1</sup> <sub>cat.</sub>       | 4.5   | (7)       |
| PEBCD/C                                            | 0.5 M Li <sub>2</sub> SO <sub>4</sub> | 1.58 μg h <sup>-1</sup> cm <sup>-2</sup>                      | 2.85  | (8)       |
| Au nanorods                                        | 0.1 M KOH                             | 1.6 μg h <sup>-1</sup> cm <sup>-2</sup>                       | 3.88  | (9)       |
| Mn <sub>3</sub> O <sub>4</sub> nanocube            | 0.1 M Na <sub>2</sub> SO <sub>4</sub> | 11.6 μg h <sup>-1</sup> mg <sup>-1</sup> <sub>cat.</sub>      | 3.0   | (10)      |
| TiO <sub>2</sub> -rGO                              | 0.1 M Na <sub>2</sub> SO <sub>4</sub> | 15.13 μg h <sup>-1</sup> mg <sup>-1</sup> <sub>cat.</sub>     | 3.3   | (11)      |
| hollow Cr <sub>2</sub> O <sub>3</sub> microspheres | 0.1 M Na <sub>2</sub> SO <sub>4</sub> | 25.3 μg h <sup>-1</sup> mg <sup>-1</sup> <sub>cat.</sub>      | 6.78  | (12)      |
| β-FeOOH nanorod                                    | 0.5 M LiClO <sub>4</sub>              | 23.32 μg h <sup>-1</sup> mg <sup>-1</sup> <sub>cat.</sub>     | 6.7   | (13)      |
| SnO <sub>2</sub>                                   | 0.1 M Na <sub>2</sub> SO <sub>4</sub> | 1.47 × 10 <sup>-10</sup> mol s <sup>-1</sup> cm <sup>-2</sup> | 2.17  | (14)      |

electrocatalysts in neutral media at ambient conditions.

## References

- (1) Zhang, R.; Ren, X.; Shi, X.; Xie, F.; Zheng, B.; Guo, X.; Sun, X. Enabling Effective Electrocatalytic N<sub>2</sub> Conversion to NH<sub>3</sub> by the TiO<sub>2</sub> Nanosheets Array under Ambient Conditions. *ACS Appl. Mater. Interfaces* **2018**, *10*(34), 28251–28255, DOI: 10.1021/acsami.8b06647.
- (2) Zhang, X.; Liu, Q.; Shi, X.; Asiri, A. M.; Luo, Y.; Li, T.; Sun, X. TiO<sub>2</sub> Nanoparticles-Reduced Graphene Oxide Hybrid: An Efficient and Durable Electrocatalyst toward Artificial N<sub>2</sub> Fixation to NH<sub>3</sub> under Ambient Conditions. *J. Mater. Chem. A* **2018**, DOI: 10.1039/C8TA05627G.
- (3) Kong, J.; Lim, A.; Yoon, C.; Jang, J. H.; Ham, H. C.; Han, J.; Nam, S.; Kim, D.; Sung, Y. E.; Choi, J.; Park, H. S. Electrochemical Synthesis of NH<sub>3</sub> at Low Temperature and Atmospheric Pressure Using a  $\gamma$ -Fe<sub>2</sub>O<sub>3</sub>. *ACS Sustainable Chem. Eng.* **2017**, *5*(11), 10986–10995, DOI: 10.1021/acssuschemeng.7b02890.
- (4) Liu, Q.; Zhang, X.; Zhang, B.; Luo, Y.; Cui, G.; Xie, F.; Sun, X. Ambient N<sub>2</sub> Fixation to NH<sub>3</sub> Electrocatalyzed by Spinel Fe<sub>3</sub>O<sub>4</sub> Nanorod. *Nanoscale* **2018**, *10*(30), 14386–14389, DOI: 10.1039/C8NR04524K.
- (5) Xiang, X.; Wang, Z.; Shi, X.; Fan, M.; Sun, X. Ammonia Synthesis from Electrocatalytic N<sub>2</sub> Reduction under Ambient Conditions by Fe<sub>2</sub>O<sub>3</sub> Nanorods. *ChemCatChem* **2018**, DOI: 10.1002/cctc.201801208.
- (6) Zhang, L.; Ji, X.; Ren, X.; Ma, Y.; Shi, X.; Tian, Z.; Asiri, A. M.; Chen, L.; Tang, B.; Sun, X. Electrochemical Ammonia Synthesis via Nitrogen Reduction Reaction on MoS<sub>2</sub> Catalyst: Theoretical and Experimental Studies. *Adv. Mater.*, **2018**, *30*(28), 1800191, DOI: 10.1002/adma.201800191.
- (7) Shi, M.; Bao, D.; Li, S.; Wulan, B.; Yan, J.; Jiang, Q. Anchoring PdCu Amorphous Nanocluster on Graphene for Electrochemical Reduction of N<sub>2</sub> to NH<sub>3</sub> under Ambient Conditions in Aqueous Solution. *Adv. Energy Mater.* **2018**, *8*(21), 1800124, DOI: 10.1002/aenm.201800124.
- (8) Chen, G.; Cao, X.; Wu, S.; Zeng, X.; Ding, L.; Zhu, M.; Wang, H. Ammonia Electrosynthesis with High Selectivity under Ambient Conditions via a Li<sup>+</sup>

- Incorporation Strategy. *J. Am. Chem. Soc.* **2017**, *139*(29), 9771–9774, DOI: 10.1021/jacs.7b04393.
- (9) Bao, D.; Zhang, Q.; Meng, F.; Zhong, H.; Shi, M.; Zhang, Y.; Yan, J.; Jiang, Q.; Zhang, X. Electrochemical Reduction of N<sub>2</sub> under Ambient Conditions for Artificial N<sub>2</sub> Fixation and Renewable Energy Storage Using N<sub>2</sub>/NH<sub>3</sub> Cycle. *Adv. Mater.* **2017**, *29*(3), 1604799, DOI: 10.1002/adma.201604799.
  - (10) Wu, X.; Xia, L.; Wang, Y.; Lu, W.; Liu, Q.; Shi, X.; Sun, X. Mn<sub>3</sub>O<sub>4</sub> Nanocube: An Efficient Electrocatalyst toward Artificial N<sub>2</sub> Fixation to NH<sub>3</sub>. *Small* **2018**, DOI: 10.1002/smll.201803111.
  - (11) Zhang, X.; Liu, Q.; Shi, X.; Asiri, A. M.; Luo, Y.; Sun, X.; Li, T. TiO<sub>2</sub> Nanoparticles-Reduced Graphene Oxide Hybrid: An Efficient and Durable Electrocatalyst toward Artificial N<sub>2</sub> Fixation to NH<sub>3</sub> under Ambient Conditions. *J. Mater. Chem. A* **2018**, *6*, 17303–17306, DOI: 10.1039/C8TA05627G.
  - (12) Zhang, Y.; Qiu, W.; Ma, Y.; Luo, Y.; Tian, Z.; Cui, G.; Xie, F.; Chen, L.; Li, T.; Sun, X. High-Performance Electrohydrogenation of N<sub>2</sub> to NH<sub>3</sub> Catalyzed by Multishelled Hollow Cr<sub>2</sub>O<sub>3</sub> Microspheres at Ambient Conditions. *ACS Catal.* **2018**, *8*(9), 8540–8544, DOI: 10.1021/acscatal.8b02311.
  - (13) Zhu, X.; Liu, Z.; Liu, Q.; Luo, Y.; Shi, X.; Asiri, a. M.; Wu, Y.; Sun, X. Efficient and Durable N<sub>2</sub> Reduction Electrocatalysis at Ambient Conditions: β-FeOOH Nanorod as a Non-Noble-Metal Catalyst. *Chem. Commun.* **2018**, *54*, 11332–11335, DOI: 10.1039/C8CC06366D.
  - (14) Zhang, L.; Ren, X.; Luo, Y.; Shi, X.; Asiri, A. M.; Li, T.; Sun, X. Ambient NH<sub>3</sub> Synthesis via Electrochemical Reduction of N<sub>2</sub> over Cubic Sub-Micron SnO<sub>2</sub> particle. *Chem. Commun.* **2018**, DOI: 10.1039/C8CC06524A.
